# Supplementary material for: In Silico and In Vivo Evaluation of Synthesized SCP-2 Inhibiting Compounds on Life Table Parameters of Helicoverpa armigera (Hübner)
Source: MDPI journal article supplement (doi:10.3390/insects13121169), 2022-12-16
Supplement: s1 [file s1]

A) SCP-2-OA-01

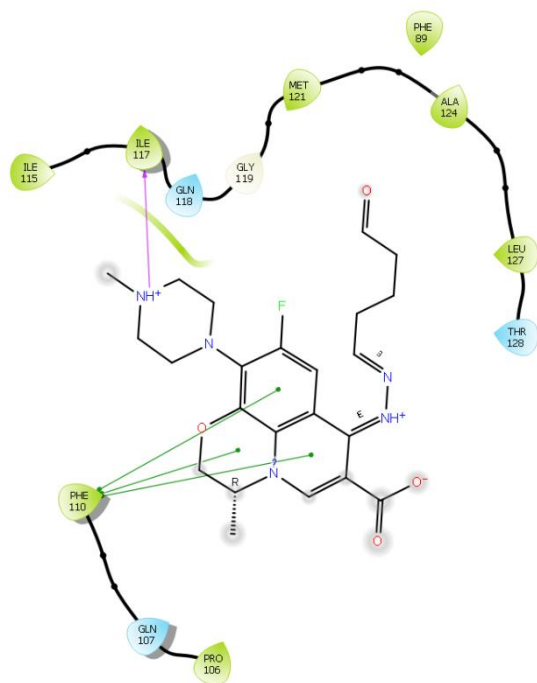

B) SCP-2-OA-02

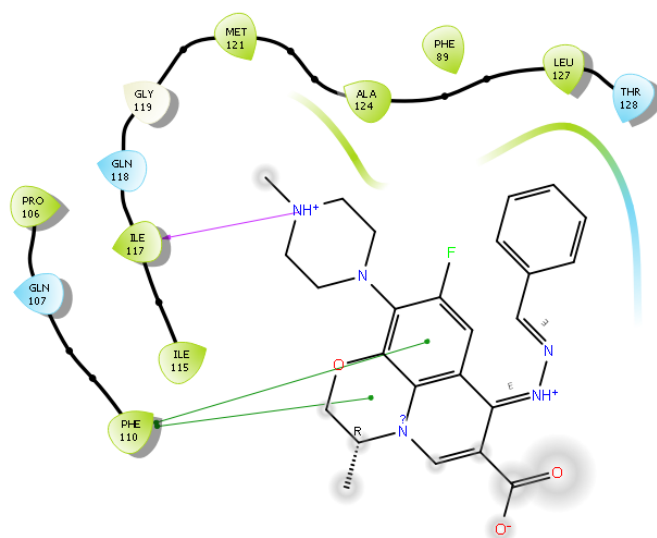

C) SCP-2-OA-03

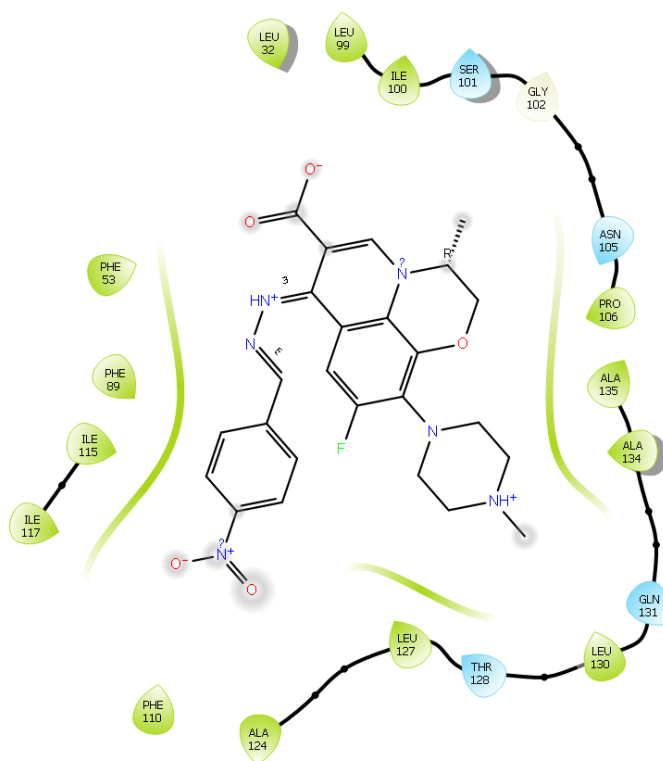

D) SCP-2-OA-04

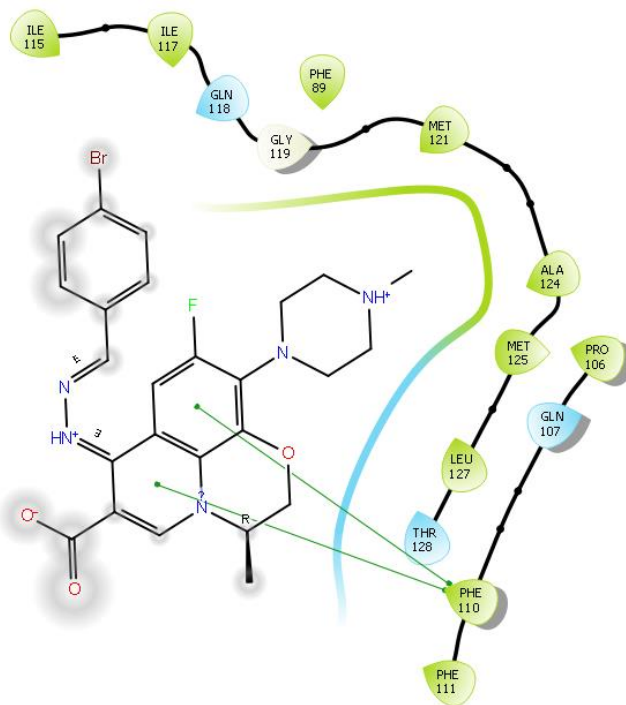

E) SCP-2-OA-05

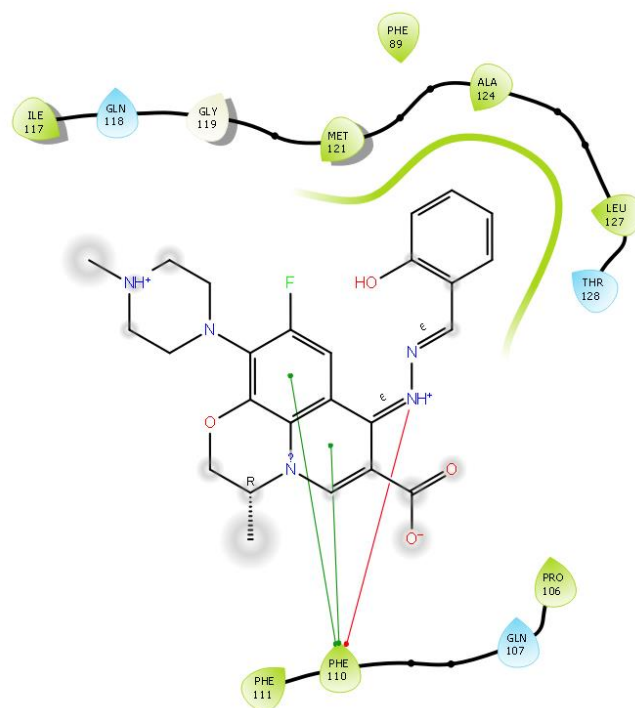

F) SCP-2-OA-06

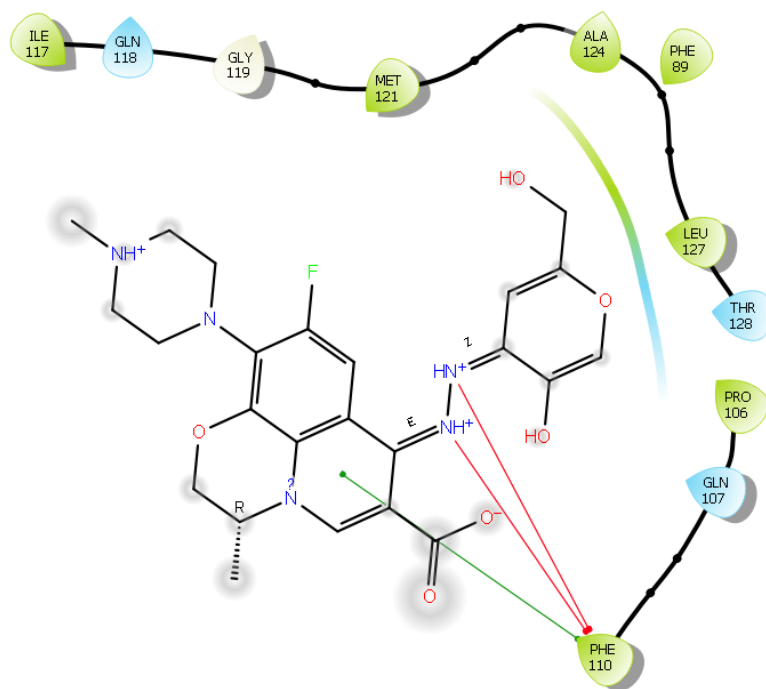

G) SCP-2-OA-07

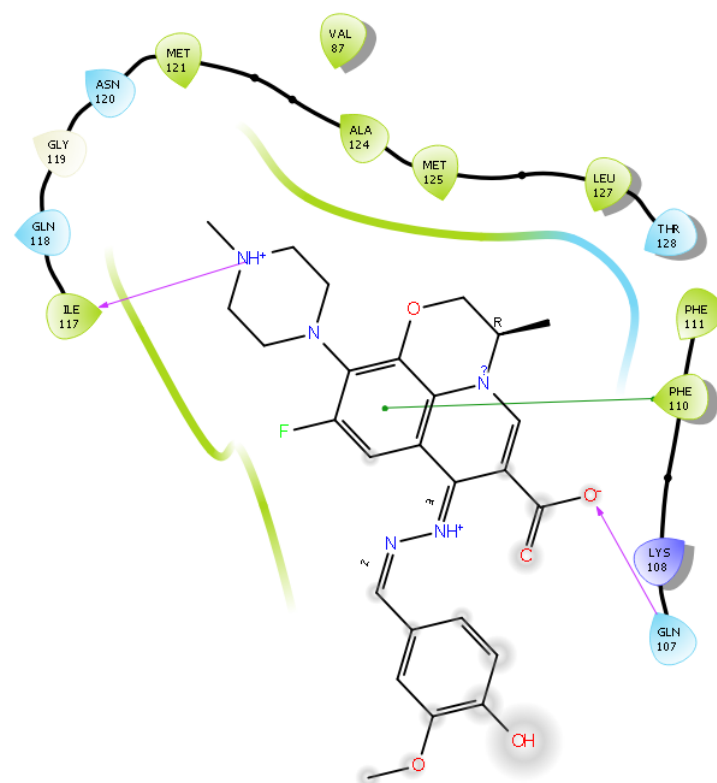

H) SCP-2-OA-08

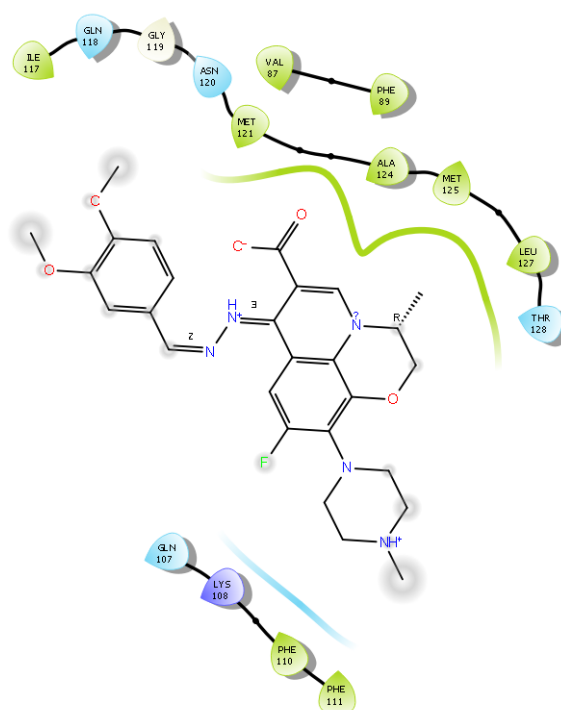

I) SCP-2-OA-09

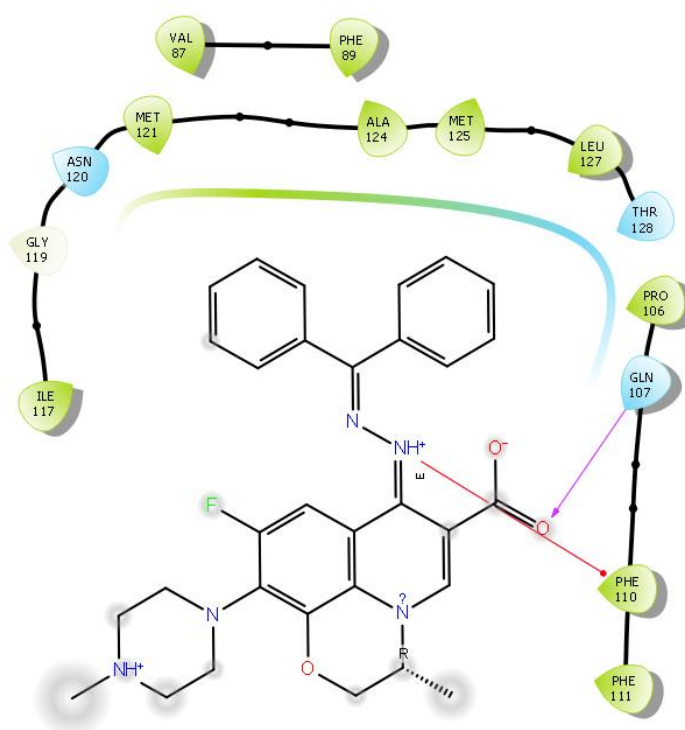

Figure S1: Interactions of the OA series compounds with the SCP2 protein

Table S1: Binding free energy calculations of complexes by MM/GBSA

| <b>BINDING ENERGY COMPONENTS</b>                                                             | <b>SCP2-OA-02</b> | <b>SCP2-OA-06</b> | <b>SCP2-OA-09</b> |
|----------------------------------------------------------------------------------------------|-------------------|-------------------|-------------------|
| $\Delta G_{\text{bind}} = (G_{\text{complex}}) - (G_{\text{protein}}) - (G_{\text{ligand}})$ |                   |                   |                   |
| VDWAALS                                                                                      | $-34.80 \pm 0.45$ | $-37.48 \pm 0.54$ | $-38.02 \pm 0.42$ |
| EEL                                                                                          | $-2.78 \pm 1.41$  | $2.62 \pm 0.85$   | $-6.39 \pm 1.18$  |
| EGB                                                                                          | $17.68 \pm 1.35$  | $18.36 \pm 0.87$  | $21.19 \pm 1.12$  |
| ESURF                                                                                        | $-4.51 \pm 0.04$  | $-4.86 \pm 0.05$  | $-4.96 \pm 0.04$  |
| DELTA G gas                                                                                  | $-37.59 \pm 1.39$ | $-34.85 \pm 1.07$ | $-44.41 \pm 1.22$ |
| DELTA G solv                                                                                 | $13.17 \pm 1.35$  | $13.50 \pm 0.84$  | $16.22 \pm 1.10$  |
| DELTA TOTAL                                                                                  | $-24.42 \pm 0.33$ | $-21.35 \pm 0.45$ | $-28.19 \pm 0.40$ |

Table S2: Contribution of active site residues in the binding free energies

| RESIDUES | SCP2-OA-02         | SCP2-OA-06         | SCP2-OA-09         |
|----------|--------------------|--------------------|--------------------|
| VAL87    | $0.054 \pm 0.008$  | $0.08 \pm 0.01$    | $-0.171 \pm 0.008$ |
| PHE89    | $-0.472 \pm 0.026$ | $-0.605 \pm 0.047$ | $-0.184 \pm 0.015$ |
| PRO106   | $-0.925 \pm 0.05$  | $-1.238 \pm 0.048$ | $-0.35 \pm 0.027$  |
| GLN107   | $-3.544 \pm 0.252$ | $-2.16 \pm 0.091$  | $-4.008 \pm 0.208$ |
| PHE110   | $-2.214 \pm 0.137$ | $-4.107 \pm 0.073$ | $-3.59 \pm 0.065$  |
| PHE111   | $-0.421 \pm 0.057$ | $-0.127 \pm 0.01$  | $-1.688 \pm 0.056$ |
| ILE117   | $-1.779 \pm 0.063$ | $-1.502 \pm 0.078$ | $-1.921 \pm 0.056$ |
| GLY119   | $-0.89 \pm 0.137$  | $-0.439 \pm 0.077$ | $0.018 \pm 0.024$  |
| ASN120   | $0.368 \pm 0.043$  | $0.492 \pm 0.055$  | $-0.245 \pm 0.014$ |
| MET121   | $-2.985 \pm 0.086$ | $-3.134 \pm 0.084$ | $-2.639 \pm 0.077$ |
| ALA124   | $-0.451 \pm 0.024$ | $-0.544 \pm 0.041$ | $-0.988 \pm 0.04$  |
| MET125   | $-1.195 \pm 0.055$ | $-0.865 \pm 0.051$ | $-0.724 \pm 0.038$ |
| LEU127   | $-0.012 \pm 0.007$ | $-0.036 \pm 0.01$  | $-0.072 \pm 0.008$ |
| THR128   | $-0.199 \pm 0.027$ | $-0.296 \pm 0.022$ | $-0.02 \pm 0.048$  |
